# Supplementary material
Source: publisher figshare collection journal article supplement (https://acs.figshare.com/ndownloader/files/3840448)
Supplement: Supplementary file 1 [file 3840448]

Silane-Allyl Coupling Reactions of  $\text{Cp}^*(^i\text{Pr}_2\text{MeP})\text{Fe}(\eta^3\text{-C}_3\text{H}_5)$  and  
Synthetic Access to the Hydrido-Dinitrogen Complex

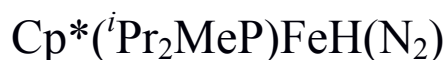

**Supporting Information**

Patrick W. Smith and T. Don Tilley\*

\*E-mail: [tdtilley@berkeley.edu](mailto:tdtilley@berkeley.edu)

**Contents:**

|          |                                                                                           |
|----------|-------------------------------------------------------------------------------------------|
| Page S2  | Experimental Details and Characterization                                                 |
| Page S7  | NMR Spectroscopy of <b>4</b> in degassed benzene- $d_6$                                   |
| Page S8  | Determination of K and $\Delta G^\circ$ for the equilibrium between <b>4</b> and <b>5</b> |
| Page S11 | Crystallographic Data Tables                                                              |
| Page S15 | Computational Details                                                                     |
| Page S16 | References                                                                                |

**General Considerations.** All manipulations were carried out using standard Schlenk or inert atmosphere glovebox techniques with an atmosphere of dry dinitrogen. All solvents were dried over activated alumina prior to use. Benzene-*d*<sub>6</sub> was dried by vacuum distillation from Na/K alloy. Cp\*H,<sup>1</sup> <sup>i</sup>Pr<sub>2</sub>MeP,<sup>2</sup> DMPSiH<sub>3</sub>,<sup>3</sup> and Mes<sub>2</sub>SiH<sub>2</sub><sup>4</sup> were prepared by literature procedures. Fe(acac)<sub>2</sub> was purchased from Sigma-Aldrich and sublimed prior to use.

NMR spectra were recorded using Bruker AVB 400, AV-500, or AV-600 spectrometers equipped with a 5 mm broad band probe. Spectra were recorded at room temperature (ca. 22 °C) and referenced to the residual protonated solvent for <sup>1</sup>H. <sup>31</sup>P{<sup>1</sup>H} NMR spectra were referenced relative to 85% H<sub>3</sub>PO<sub>4</sub> external standard ( $\delta = 0$ ). <sup>13</sup>C{<sup>1</sup>H} NMR spectra were calibrated internally with the resonance for the solvent relative to tetramethylsilane. For <sup>13</sup>C{<sup>1</sup>H} NMR spectra, resonances obscured by the solvent signal are omitted. <sup>29</sup>Si NMR spectra were obtained via 2D <sup>1</sup>H <sup>29</sup>Si HMBC unless otherwise specified. The following abbreviations have been used to describe infrared features: “s” for strong, “m” for medium, “w” for weak, “v” for very, “b” for broad. Elemental analyses were performed by the College of Chemistry Microanalytical Laboratory at the University of California, Berkeley.

**X-ray Diffraction Experiments.** Single crystal X-ray diffraction experiments were carried out at the UC Berkeley CHEXRAY crystallographic facility. Measurements of compounds were performed on a Bruker APEX-II CCD area detector using Mo K radiation ( $\lambda = 0.71073\text{\AA}$ ) monochromated using QUAZAR multilayer mirrors. Specific details of each experiment can be found below, in section 5 at the end of this document and in the included crystallographic information files.

**Synthesis of Cp\*(<sup>i</sup>Pr<sub>2</sub>MeP)Fe( $\eta^3$ -C<sub>3</sub>H<sub>5</sub>) (1).** To a stirred solution of Cp\*H (0.80 g, 5.91 mmol) in THF (60 mL) was added 1.6 M n-BuLi (3.69 mL, 5.91 mmol). This was stirred for 20 m, after which the mixture was transferred *via* cannula to a flask containing Fe(acac)<sub>2</sub> (1.50 g, 5.91 mmol) in THF (20 mL) that had been cooled to -78 °C. To the resulting deep red mixture, <sup>i</sup>Pr<sub>2</sub>MeP (0.78 g, 5.91 mmol)

was added *via* syringe. The cooling bath was removed, and the mixture was allowed to warm to room temperature with stirring. After the solution was stirred at room temperature for 20 min, it was cooled to -78 °C and then 2.6 M (C<sub>3</sub>H<sub>5</sub>)MgBr in THF was added in one portion (7.5 mL, 15 mmol). The cooling bath was again removed and the mixture was allowed to warm to room temperature with stirring, and for an additional 20 min, before the solvent was removed under reduced pressure. The resulting deep brown residue was extracted with hexane (2 x 50 mL), hexane was removed under reduced pressure from the combined extracts, and the resulting deep red oil was crystallized from pentane at -35 °C to give the product as deep red plates. The combined yield from 3 crops: 1.18 g, 3.24 mmol, 55%. <sup>1</sup>H NMR (benzene-*d*<sub>6</sub>): δ = -0.13 (m, 5H, C<sub>3</sub>H<sub>5</sub> and P*Me*); 0.99 (dd, 6H, CH*Me*<sub>2</sub>, *J*<sub>HP</sub> = 10.0 Hz, *J* = 7.0 Hz); 0.99 (dd, 6H, CH*Me*<sub>2</sub>, *J*<sub>HP</sub> = 13.8 Hz, *J* = 7.2 Hz); 1.54 (s, 15H, Cp\*); 2.13 (m, 4H, PCH*Me*<sub>2</sub> and C<sub>3</sub>H<sub>5</sub>) 3.28 (m, 1H, C<sub>3</sub>H<sub>5</sub>) ppm. <sup>13</sup>C{<sup>1</sup>H} NMR (benzene-*d*<sub>6</sub>): δ = 0.99 (d, *J*<sub>CP</sub> = 21.50 Hz); 10.51; 18.91 (d, *J*<sub>CP</sub> = 3.93 Hz); 20.71 (d, *J*<sub>CP</sub> = 4.98 Hz); 29.24 (d, *J*<sub>CP</sub> = 15.43 Hz); 33.14 (d, *J*<sub>CP</sub> = 8.88 Hz); 74.00 (d, *J*<sub>CP</sub> = 2.59 Hz); 82.77 (s) ppm. <sup>31</sup>P NMR (400 MHz, benzene-*d*<sub>6</sub>): δ = 67 ppm. FTIR (KBr pellet): 3037 (m), 2974 (s), 2958 (s), 2904 (s), 2860 (s), 2718 (w), 1462 (m), 1373 (s), 1357 (m), 1284 (m), 1260 (w), 1198 (m), 1153 (w), 1093 (m), 1066 (m), 1044 (m), 1026 (s), 990 (m), 883 (s), 804 (w), 760 (w), 702 (m), 601 (m), 470 (m) cm<sup>-1</sup>. Anal. Calc. For C<sub>20</sub>H<sub>37</sub>PFe: C, 65.93; H, 10.24. Found: C, 65.85; H, 10.08.

**Synthesis of Cp\*Fe(*μ*-H)Si<sup>''</sup>PrMes(*η*<sup>3</sup>-CH<sub>2</sub>C<sub>6</sub>H<sub>2</sub>Me<sub>2</sub>) (2).** To a stirred solution of **1** (0.100 g, 0.275 mmol) in 4 mL of pentane was added Mes<sub>2</sub>SiH<sub>2</sub> (0.075 g, 0.280 mmol) in 2 mL of pentane. The resulting solution was stirred at room temperature for 18 h, after which all solvent was removed under reduced pressure. The resulting deep purple residue was dissolved in pentane (6 mL), which was allowed to slowly evaporate at -35 °C to give deep purple blocks. Yield: 0.087 g, 63%. <sup>1</sup>H NMR (500 MHz, benzene-*d*<sub>6</sub>) δ = -15.85 (t, *J* = 3.4 Hz, 1H, FeH*Si*), -0.47 (t, *J* = 4.1 Hz, 1H), 0.88 (q, *J* = 7.0 Hz,

2H), 0.99 (t,  $J = 6.9$  Hz, 3H), 1.58 (s, 15H), 1.97 (s, 3H), 2.08 (s, 3H), 2.20 (s, 3H), 2.57 (d,  $J = 3.7$  Hz, 4H), 2.61 (s, 3H), 6.39 (s, 1H), 6.61 (s, 1H), 6.76 (s, 1H), 6.99 (s, 1H) ppm.  $^{13}\text{C}$  NMR (126 MHz, benzene- $d_6$ )  $\delta = 10.34, 18.94, 19.98, 20.37, 21.04, 21.74, 24.10, 24.28, 25.37, 28.46, 61.68, 80.50, 102.23, 124.58, 128.58, 128.70, 128.76, 137.23, 138.45, 143.29, 144.85, 149.76$  ppm.  $^{29}\text{Si}$  NMR (500 MHz, benzene- $d_6$ ):  $\delta = -27$  ppm. FTIR (KBr pellet):  $\nu = 3013$  (w), 2959 (s), 2902 (s), 2866 (s), 1701 (wb), 1618 (m), 1604 (m), 1516 (w), 1448 (sb), 1409 (m), 1376 (s), 1331 (w), 1316 (w), 1225 (w), 1067 (s), 1029 (s), 991 (w), 891 (m), 847 (m), 831 (m), 798 (w), 719 (m), 689 (m)  $\text{cm}^{-1}$ . Anal. Calc. for  $\text{C}_{31}\text{H}_{44}\text{FeSi}$ : C, 74.38; H, 8.86. Found: C, 74.65; H, 8.86.

**Synthesis of  $\text{Cp}^*\text{Fe}(\mu\text{-H})\text{SiH}(\text{DMP})(\eta^3\text{-CHCHCH}_2)$  (3).** To a stirred solution of **1** (0.080 g, 0.220 mmol) in 4 mL of pentane was added  $\text{DMPSiH}_3$  (0.076 g, 0.220 mmol) in 8 mL of pentane. The resulting solution was allowed to stir at room temperature for 3 h, after which all the solvent was removed under reduced pressure. The resulting deep red residue was dissolved in pentane (6 mL), which was allowed to slowly evaporate at  $-35^\circ\text{C}$  to give deep red plates. Yield: 0.044 g, 0.088 mmol, 40 %.  $^1\text{H}$  NMR (600 MHz, benzene- $d_6$ ):  $\delta = -16.72$  (td,  $J = 4.0, {}^1J_{\text{SiH}} = 94$  Hz, 2.6 Hz, 1H, FeH),  $-0.18$  (dt,  $J = 9.3, 3.1$  Hz, 1H), 1.41 (s, 15H,  $\text{Cp}^*$ ), 1.98 (dt,  $J = 6.6, 2.0$  Hz, 1H), 2.14 (s, 6H), 2.16 (s, 6H,  $\text{o-CH}_3$ ), 2.31 (s, 6H), 2.34 (d,  $J = 2.5$  Hz, 1H), 3.84 (dt,  $J = 9.0, 7.0$  Hz, 1H), 4.59 (d,  $J = 2.5$  Hz,  ${}^1J_{\text{SiH}} = 222$  Hz, 1H, SiH), 6.79 (d,  $J = 7.6$  Hz, 2H), 7.00 (s, 4H), 7.10 (t,  $J = 7.6$  Hz, 1H) ppm.  $^{13}\text{C}\{^1\text{H}\}$  NMR (400 MHz, benzene- $d_6$ ):  $\delta = 10.16, 21.18, 21.34, 21.40, 32.96, 39.17, 83.13, 91.57, 128.84, 128.93, 130.10, 136.10, 136.60, 136.68, 140.80, 149.74$  ppm.  $^{29}\text{Si}$  NMR (600 MHz, benzene- $d_6$ ):  $\delta = -34$  ppm. FTIR (KBr pellet):  $\nu = 3021$  (m), 2970 (s), 2946 (s), 2912 (s), 2855 (m), 2728 (w), 2127 (s,  $\nu_{\text{SiH}}$ ), 1735 (bw), 1610 (m), 1556 (m), 1479 (m), 1443 (s), 1378 (s), 1296 (w), 1260 (w), 1293 (w), 1176 (w), 1116 (m), 1085 (w), 1066 (w), 1048 (w), 1031 (m), 988 (w), 852 (vs), 804 (s), 780 (m), 739 (s), 731 (m), 650 (m)  $\text{cm}^{-1}$ . Anal. Calc. For  $\text{C}_{37}\text{H}_{44}\text{SiFe}$ : C, 77.60; H, 7.74. Found: C, 77.63; H, 7.84.

**Synthesis of  $\text{Cp}^*(^i\text{Pr}_2\text{MeP})\text{FeH}_2(\text{SiH}_2\text{DMP})$  (**4**). Method A:** The mother liquor from the recrystallization of **2** was allowed to evaporate further at  $-35\text{ }^\circ\text{C}$ , to provide **4** as yellow needles. Yield:  $< 0.01\text{ g}$ ,  $< 10\%$  **Method B:** A solution of **1** ( $0.200\text{ g}$ ,  $0.549\text{ mmol}$ ) in pentane ( $5\text{ mL}$ ) was stirred under  $1\text{ atm}$  of hydrogen for  $40\text{ min}$ . To the resulting solution was added solid  $\text{DMPSiH}_3$  ( $0.157\text{ g}$ ,  $0.456\text{ mmol}$ ), and this solution was stirred under hydrogen for  $2\text{ h}$ , at which point a yellow precipitate had formed. The solvent was removed under reduced pressure, and the resulting yellow powder was recrystallized twice from pentane at  $-35\text{ }^\circ\text{C}$  to give yellow needles. Yield:  $0.061\text{ g}$ ,  $20\%$ . The NMR spectra of **4** (benzene- $d_6$ ,  $\text{N}_2$  atmosphere) contain resonances for  $\text{DMPSiH}_3$  and **5**. Spectra for **4**:  $^1\text{H}$  NMR ( $600\text{ MHz}$ , benzene- $d_6$ )  $\delta = -15.00$  (d,  $J_{\text{HP}} = 57.1\text{ Hz}$ ,  $2\text{H}$ ,  $\text{FeH}$ ),  $0.04$  (d,  $J_{\text{HP}} = 8.0\text{ Hz}$ ,  $3\text{H}$ ,  $\text{PMe}$ ),  $0.80$  (dd,  $J_{\text{HP}} = 12.2$ ,  $J = 6.7\text{ Hz}$ ,  $6\text{H}$   $\text{PCHMe}$ ),  $0.97 - 0.83$  (m, **5**  $\text{PMe}$ , **5**  $\text{PCHMe}$ , and **4**  $\text{PCHMe}$ ),  $1.54$  (m,  $17\text{H}$ ,  $\text{Cp}^*$  and  $\text{PCHMe}_2$ ),  $2.29$  (s,  $6\text{H}$ ,  $p\text{-Mes}$ ),  $2.41$  (s,  $12\text{H}$ ,  $o\text{-Mes}$ ),  $4.87$  (s,  $2\text{H}$ ,  $\text{SiH}_2$ ),  $6.90$  (s,  $4\text{H}$ ,  $m\text{-Mes}$ ),  $6.96$  (d,  $J = 7.8\text{ Hz}$ ,  $2\text{H}$ ,  $m\text{-C}_6\text{H}_3$ ),  $7.22$  (t,  $J = 7.4\text{ Hz}$ ,  $1\text{H}$ ,  $p\text{-C}_6\text{H}_3$ ) ppm.  $^{13}\text{C}$  NMR ( $151\text{ MHz}$ , benzene- $d_6$ )  $\delta = 9.70$  (d,  $J_{\text{CP}} = 25.5\text{ Hz}$ ),  $11.77$ ,  $18.16$ ,  $19.50$  (d,  $J_{\text{CP}} = 2.2\text{ Hz}$ ),  $22.34$ ,  $27.51$  (d,  $J_{\text{CP}} = 19.3\text{ Hz}$ ),  $87.75$ ,  $129.02$ ,  $130.13$ ,  $135.44$ ,  $137.05$ ,  $143.14$ ,  $143.28$ ,  $149.83$  ppm.  $^{31}\text{P}$  NMR ( $400\text{ MHz}$ , benzene- $d_6$ ):  $\delta = 75\text{ ppm}$ .  $^{29}\text{Si}$  NMR ( $600\text{ MHz}$ , benzene- $d_6$ ):  $\delta = -23\text{ ppm}$ . Anal. Calcd. For  $\text{C}_{41}\text{H}_{61}\text{FePSi}$ : C,  $73.63$ ; H,  $9.19$ ; N,  $0.00$ . Found: C,  $73.55$ ; H,  $8.87$ ; N,  $0.47$ ; The nitrogen content is likely due to cocrystallization with a small amount of the dinitrogen complex **5**, with which **4** is in equilibrium in solution.

**Synthesis of  $\text{Cp}^*(^i\text{Pr}_2\text{MeP})\text{FeH}(\text{N}_2)$  (**5**).** Compound **1** ( $0.240\text{ g}$ ,  $0.485\text{ mmol}$ ) was dissolved in  $20\text{ mL}$  pentane and placed in a  $500\text{ mL}$  Teflon-stoppered Schlenk flask. The solution was subjected to  $3$  freeze-pump-thaw cycles, after which a hydrogen atmosphere was introduced. The resulting solution was stirred at room temperature for  $40\text{ min}$ , at which point it had turned bright yellow. The solution was frozen, after which the flask was evacuated and backfilled with nitrogen. The solution was allowed

to warm to room temperature with stirring, and stirring was continued for an additional 20 min, after which the solvent was removed to give a red oily residue. This was recrystallized by slow evaporation of a pentane-hexamethyldisiloxane (1:1, 2 mL total) solution at -35 ° C to give **5** as orange blocks. Yield: 0.146 g, 62 %.  $^1\text{H}$  NMR (600 MHz, benzene- $d_6$ ):  $\delta$  = -12.14 (d,  $J_{\text{HP}}$  = 80.5 Hz, 1H), 0.90 – 0.84 (m, 6H), 0.93 (dd,  $J_{\text{HP}}$  = 14.4,  $J$  = 6.8 Hz, 3H), 1.02 (dd,  $J_{\text{HP}}$  = 14.5,  $J$  = 6.7 Hz, 3H), 1.18 (dd,  $J_{\text{HP}}$  = 15.0,  $J$  = 7.2 Hz, 3H), 1.55-1.65 (m, 1H), 1.73 (s, 15H), 1.90 – 1.81 (m, 1H) ppm.  $^{13}\text{C}$  NMR (151 MHz, benzene- $d_6$ )  $\delta$  = 7.19 (d,  $J_{\text{CP}}$  = 15.4 Hz), 11.12, 16.34 (d,  $J_{\text{CP}}$  = 4.6 Hz), 17.02 (d,  $J_{\text{CP}}$  = 2.9 Hz), 17.86 (d,  $J_{\text{CP}}$  = 2.4 Hz), 18.83 (d,  $J_{\text{CP}}$  = 4.3 Hz), 24.52 (d,  $J_{\text{CP}}$  = 18.1 Hz), 28.74 (d,  $J_{\text{CP}}$  = 27.5 Hz), 87.62 ppm.  $^{31}\text{P}$  NMR (400 MHz, benzene- $d_6$ ):  $\delta$  = 75.84 ppm. FTIR (KBr pellet):  $\nu$  = 2956 (s), 2929 (m), 2911 (m), 2869 (m), 2733 (w), 2047 (m,  $\nu_{\text{N}_2}$ ), 1711 (w), 1635 (m), 1469 (m), 1444 (m), 1373 (m), 1302 (m), 1262 (w), 1173 (m), 1143 (s), 1088 (s), 929 (m), 891 (m), 807 (m), 754 (m), 674 (m). Anal. Calcd. For  $\text{C}_{17}\text{H}_{33}\text{N}_2\text{FeP}$ : C, 57.96; H, 9.44; N, 7.95. Found: C, 57.79; H, 9.80; N, 7.60.

**Hydrogenolysis of 1 in benzene- $d_6$ .** A solution of **1** (0.010 g, 0.02 mmol) was dissolved in benzene- $d_6$  (0.5 mL). The solution was freeze-pump-thawed three times, after which it was backfilled with hydrogen. Every 20 min for the next 1 h, the solution was frozen and the hydrogen atmosphere was removed and refilled to replenish the consumed hydrogen. The solution was allowed to react for a further hour before a  $^1\text{H}$  NMR spectrum was recorded. A single product assigned as  $\text{Cp}^*(^i\text{Pr}_2\text{MeP})\text{FeH}_3$  was observed by  $^1\text{H}$  NMR spectroscopy.  $^1\text{H}$  NMR (600 MHz, benzene- $d_6$ )  $\delta$  = -12.25 (m, 3H,  $\text{FeH}_3$ ), 1.04 – 0.78 (m, 21H,  $\text{MeCH}_2\text{Me}$ ,  $\text{PMe}$ ,  $\text{PCHMe}_2$ ), 1.30 – 1.18 (m, 2H,  $\text{MeCH}_2\text{Me}$ ), 1.37 (m, 2H,  $\text{PCHMe}_2$ ), 1.95 (s, 15H,  $\text{Cp}^*$ ) ppm.

**Reaction of 5 with  $\text{DMPSiH}_3$ .** Compound **5** (0.025 g, 0.071 mmol) was dissolved in benzene- $d_6$  (0.5 mL) and the resulting solution was added to solid  $\text{DMPSiH}_3$  (0.024 g, 0.071 mmol). The mixture was swirled until all  $\text{DMPSiH}_3$  had dissolved, over which time the solution turned from orange to

yellow. The  $^1\text{H}$  NMR spectrum of this solution matched that for crystals of **4**.

**NMR spectroscopy of **4** in degassed benzene- $d_6$ :** Benzene- $d_6$  (0.5 mL) was degassed by 3 freeze-pump-thaw cycles. The degassed solvent was vacuum-transferred onto crystals of **4** (0.008 g, 0.012 mmol) and ferrocene (0.0023 g, 0.012 mmol) as an internal standard. The spectrum is shown in Figure S1.

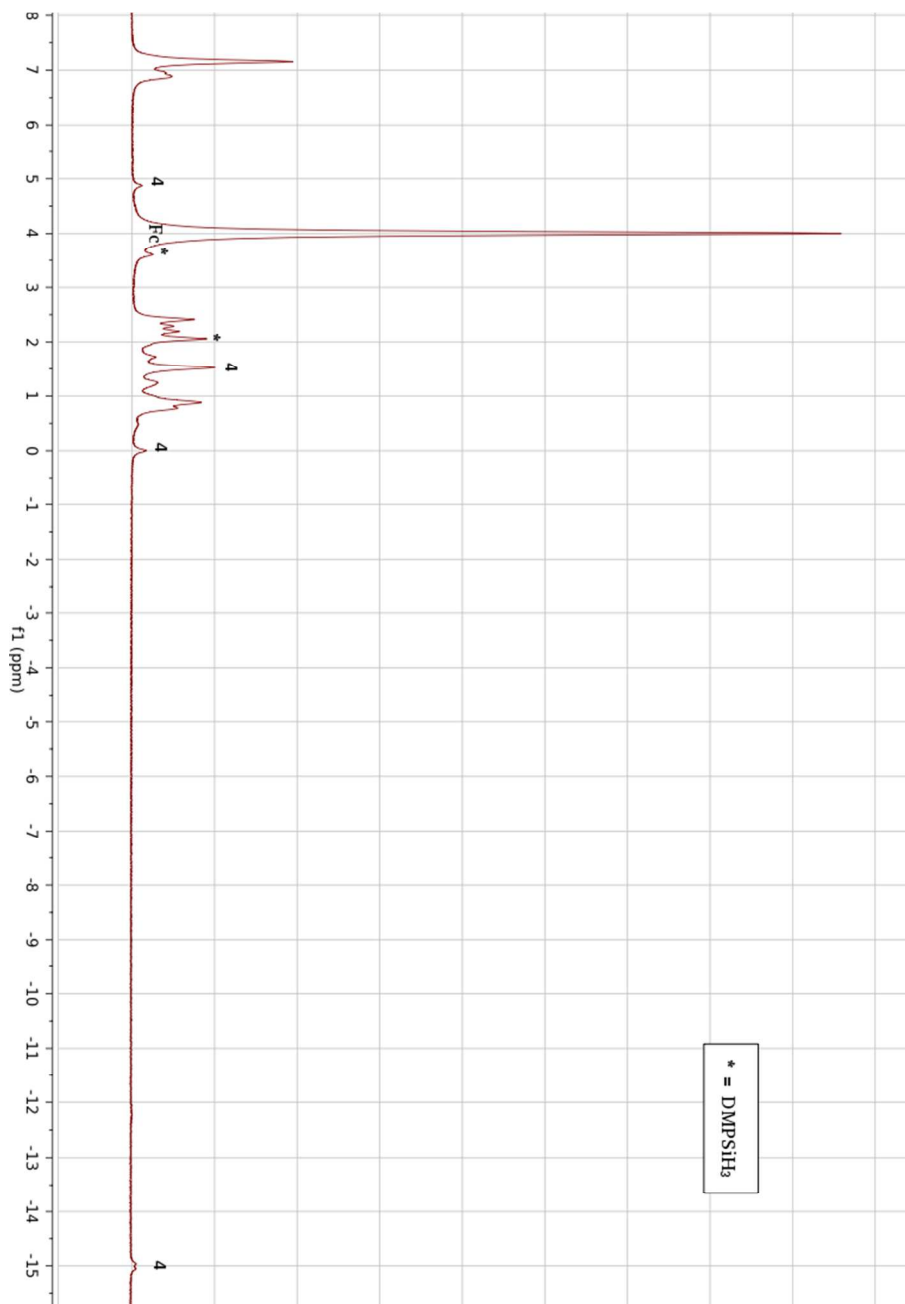

**Figure S1:**  $^1\text{H}$  NMR spectrum of crystals of **4** dissolved in degassed benzene- $d_6$ .

**Determination of the equilibrium constant and  $\Delta G^\circ$ :** Crystals of **3** were dissolved in 0.5 mL of benzene- $d_6$  containing 1,3,5-tris(trifluoromethyl)benzene at a concentration of 5.3 mM as an internal standard. The  $^1\text{H}$  NMR spectrum of each sample was recorded; a sample spectrum is given in Figure S2. Integration of selected resonances against the internal standard was used to determine the concentrations of **4**, **5**, and  $\text{DMPSiH}_3$ . The integration regions, as well as the total number of protons associated with each region, are given in Table S1. The concentration of dinitrogen in benzene at various temperatures has been previously reported.<sup>5</sup> The averages of the integrated concentrations for each sample are given in Table S2; these concentrations were used for further calculations. The equilibrium constant for each sample was determined by the equation  $\frac{[\text{DMPSiH}_3][5]}{[\text{N}_2][4]}$ ;  $\Delta G^\circ$  values were calculated based on the experimental equilibrium constants. The results of these calculations, as well as the average values, are given in Table S3.



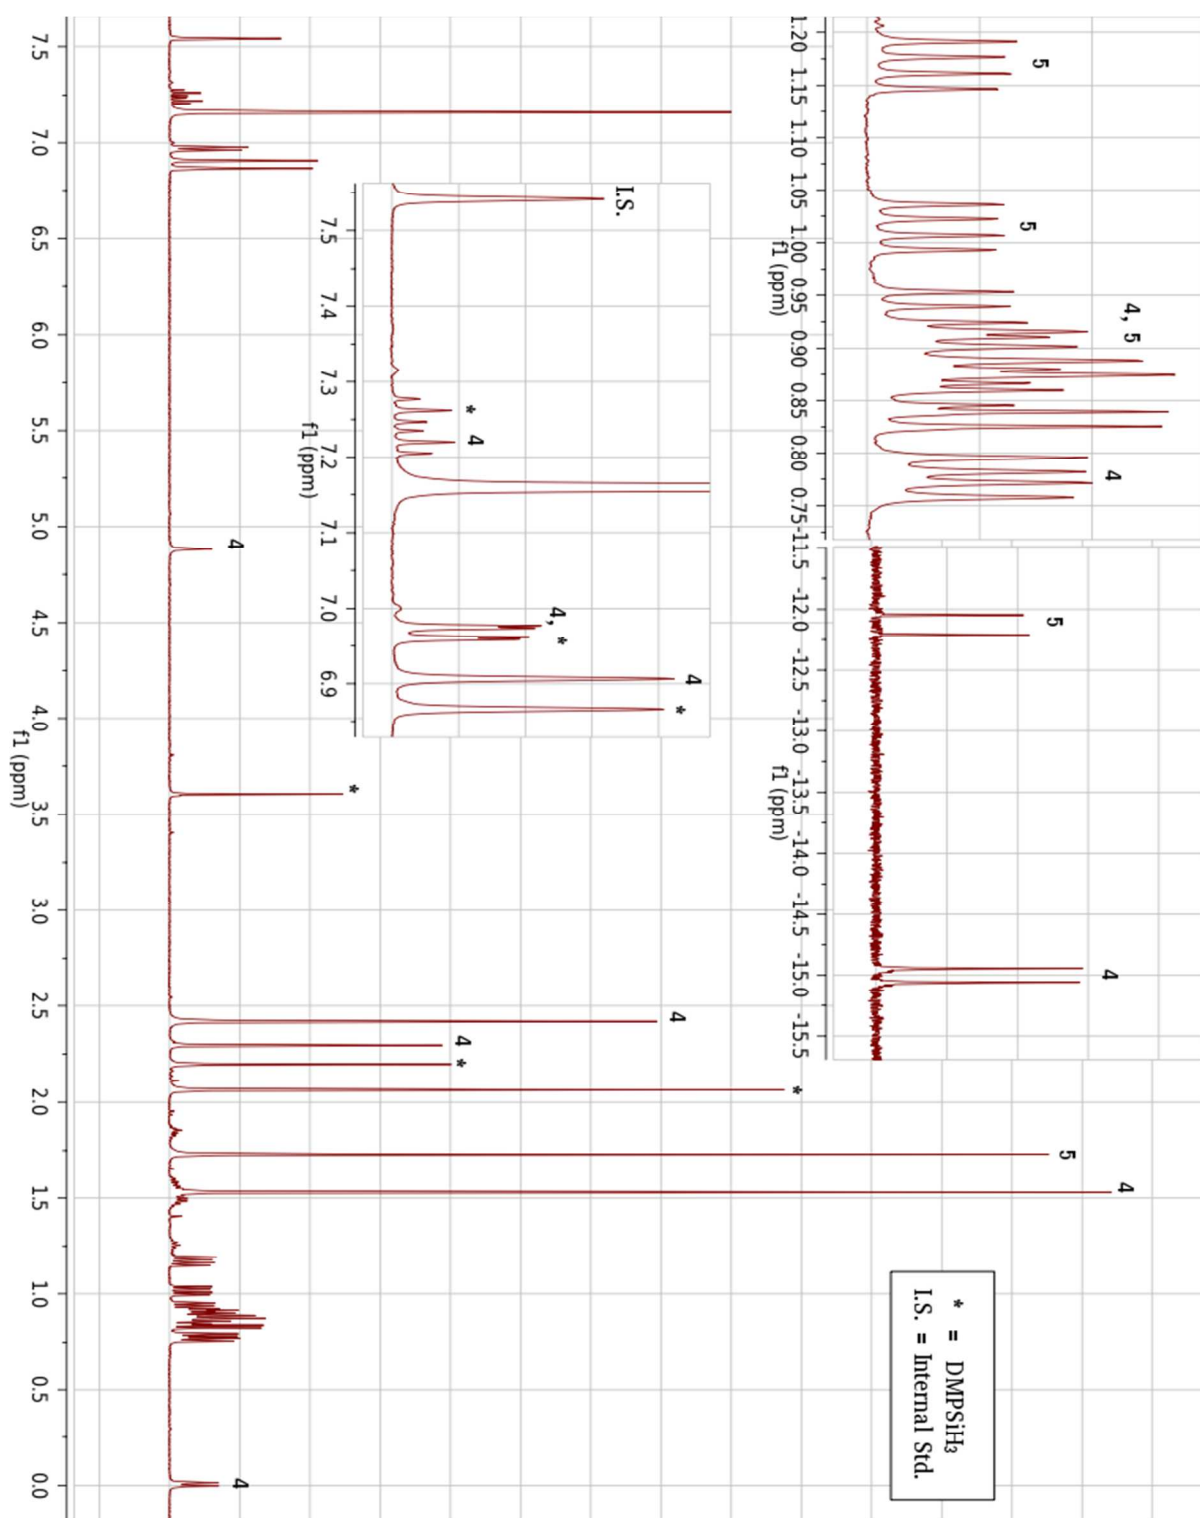

**Figure S2:** Sample spectrum of equilibrium mixture with peak assignments.

| <b>Table S1: Integrals used for determination of equilibrium species concentrations</b> |                   |               |               |               |               |               |               |
|-----------------------------------------------------------------------------------------|-------------------|---------------|---------------|---------------|---------------|---------------|---------------|
| Compound                                                                                | Internal Standard | 3             | 3             | 3             | 3             | 3             | 3             |
| Protons                                                                                 | 3                 | 4             | 2             | 12            | 6             | 6             | 3             |
| Integral range ( $\delta$ , ppm)                                                        | 7.555 – 7.528     | 6.920 – 6.895 | 4.949 – 4.820 | 2.472 – 2.379 | 2.326 – 2.272 | 0.806 – 0.739 | 0.030 – 0.021 |
| Compound                                                                                | DMPSiH3           | DMPSiH3       | DMPSiH3       | DMPSiH3       | 4             | 4             | 4             |
| Protons                                                                                 | 4                 | 3             | 6             | 12            | 15            | 3             | 3             |
| Integral range ( $\delta$ , ppm)                                                        | 6.882 – 6.851     | 3.821 – 3.367 | 2.241 – 2.175 | 2.102 – 2.027 | 1.777 – 1.693 | 1.200 – 1.138 | 1.048 – 0.984 |

| <b>Table S2: Average concentrations (mol/L) found by integration against internal standard</b> |           |         |           |         |           |           |                 |         |
|------------------------------------------------------------------------------------------------|-----------|---------|-----------|---------|-----------|-----------|-----------------|---------|
| Sample                                                                                         | [3] + [4] | [3]     | stdev [3] | [4]     | Stdev [4] | [DMPSiH3] | stdev [DMPSiH3] | [N2]    |
| 1                                                                                              | 0.00738   | 0.00140 | 0.00016   | 0.00589 | 0.00048   | 0.00607   | 0.00032         | 0.00493 |
| 2                                                                                              | 0.01272   | 0.00411 | 0.00036   | 0.00855 | 0.00029   | 0.00867   | 0.00061         | 0.00493 |
| 3                                                                                              | 0.02517   | 0.01276 | 0.00075   | 0.01224 | 0.00044   | 0.01257   | 0.00065         | 0.00493 |

| <b>Table S3: Calculated equilibrium constants and <math>\Delta G^\circ</math></b> |           |            |                             |                           |
|-----------------------------------------------------------------------------------|-----------|------------|-----------------------------|---------------------------|
| Sample                                                                            | K         | error in K | $\Delta G^\circ$ (kcal/mol) | error in $\Delta G^\circ$ |
| 1                                                                                 | 5.195     | 0.116      | -0.958                      | -0.013                    |
| 2                                                                                 | 3.665     | 0.051      | -0.755                      | -0.008                    |
| 3                                                                                 | 2.450     | 0.018      | -0.521                      | -0.004                    |
|                                                                                   |           |            |                             |                           |
|                                                                                   | Average K | error      | Average $\Delta G^\circ$    | error                     |
|                                                                                   | 3.77      | 0.06       | -0.745                      | 0.008                     |

## Crystallographic Data Tables

**Table S4: Crystal data and structure refinement for Compound 2**

|                                             |                                                   |
|---------------------------------------------|---------------------------------------------------|
| Identification code                         | Compound 2                                        |
| Empirical formula                           | C <sub>34</sub> H <sub>44</sub> SiFe              |
| Formula weight                              | 504.29                                            |
| Temperature/K                               | 100.0                                             |
| Crystal system                              | triclinic                                         |
| Space group                                 | P-1                                               |
| a/Å                                         | 8.3942(6)                                         |
| b/Å                                         | 9.3342(7)                                         |
| c/Å                                         | 18.0496(13)                                       |
| $\alpha/^\circ$                             | 93.8800(10)                                       |
| $\beta/^\circ$                              | 93.4510(10)                                       |
| $\gamma/^\circ$                             | 107.7960(10)                                      |
| Volume/Å <sup>3</sup>                       | 1338.61(17)                                       |
| Z                                           | 2                                                 |
| $\rho_{\text{calc}}$ /mg/mm <sup>3</sup>    | 1.251                                             |
| m/mm <sup>-1</sup>                          | 0.628                                             |
| F(000)                                      | 500.0                                             |
| 2 $\Theta$ range for data collection        | 4.54 to 50.67°                                    |
| Index ranges                                | -10 ≤ h ≤ 10, -11 ≤ k ≤ 11, -21 ≤ l ≤ 21          |
| Reflections collected                       | 20883                                             |
| Independent reflections                     | 4780[R(int) = 0.0215]                             |
| Data/restraints/parameters                  | 4780/0/313                                        |
| Goodness-of-fit on F <sup>2</sup>           | 1.050                                             |
| Final R indexes [I ≥ 2σ (I)]                | R <sub>1</sub> = 0.0338, wR <sub>2</sub> = 0.0904 |
| Final R indexes [all data]                  | R <sub>1</sub> = 0.0376, wR <sub>2</sub> = 0.0934 |
| Largest diff. peak/hole / e Å <sup>-3</sup> | 1.11/-0.31                                        |

**Table S5: Crystal data and structure refinement for Compound 3.**

|                                                |                                                                    |
|------------------------------------------------|--------------------------------------------------------------------|
| Identification code                            | Compound 3                                                         |
| Empirical formula                              | C <sub>37</sub> H <sub>44</sub> SiFe                               |
| Formula weight                                 | 572.66                                                             |
| Temperature/K                                  | 99.99                                                              |
| Crystal system                                 | triclinic                                                          |
| Space group                                    | P-1                                                                |
| a/Å                                            | 8.7703(3)                                                          |
| b/Å                                            | 11.2002(3)                                                         |
| c/Å                                            | 17.3519(5)                                                         |
| $\alpha/^\circ$                                | 95.5940(10)                                                        |
| $\beta/^\circ$                                 | 104.4630(10)                                                       |
| $\gamma/^\circ$                                | 107.3250(10)                                                       |
| Volume/Å <sup>3</sup>                          | 1548.10(8)                                                         |
| Z                                              | 2                                                                  |
| $\rho_{\text{calc}}/\text{g cm}^{-3}$          | 1.229                                                              |
| $\mu/\text{mm}^{-1}$                           | 0.549                                                              |
| F(000)                                         | 612.0                                                              |
| Radiation                                      | MoK $\alpha$ ( $\lambda = 0.71073$ )                               |
| 2 $\theta$ range for data collection/ $^\circ$ | 3.876 to 50.974                                                    |
| Index ranges                                   | $-10 \leq h \leq 10$ , $-11 \leq k \leq 13$ , $-20 \leq l \leq 20$ |
| Reflections collected                          | 19556                                                              |
| Independent reflections                        | 5699 [ $R_{\text{int}} = 0.0331$ , $R_{\text{sigma}} = 0.0339$ ]   |
| Data/restraints/parameters                     | 5699/0/371                                                         |
| Goodness-of-fit on F <sup>2</sup>              | 1.062                                                              |
| Final R indexes [ $I \geq 2\sigma(I)$ ]        | $R_1 = 0.0427$ , $wR_2 = 0.1043$                                   |
| Final R indexes [all data]                     | $R_1 = 0.0511$ , $wR_2 = 0.1163$                                   |
| Largest diff. peak/hole / e Å <sup>-3</sup>    | 0.81/-0.65                                                         |

**Table S6: Crystal data and structure refinement for Compound 4**

|                                             |                                                   |
|---------------------------------------------|---------------------------------------------------|
| Identification code                         | Compound 4                                        |
| Empirical formula                           | C <sub>44</sub> HSiP <sub>2</sub> Fe              |
| Formula weight                              | 646.23                                            |
| Temperature/K                               | 100.0                                             |
| Crystal system                              | triclinic                                         |
| Space group                                 | P-1                                               |
| a/Å                                         | 8.8981(5)                                         |
| b/Å                                         | 11.8359(7)                                        |
| c/Å                                         | 18.8372(12)                                       |
| $\alpha/^\circ$                             | 72.175(3)                                         |
| $\beta/^\circ$                              | 82.686(3)                                         |
| $\gamma/^\circ$                             | 76.623(3)                                         |
| Volume/Å <sup>3</sup>                       | 1833.98(19)                                       |
| Z                                           | 2                                                 |
| $\rho_{\text{calc}}$ /mg/mm <sup>3</sup>    | 1.170                                             |
| m/mm <sup>-1</sup>                          | 0.525                                             |
| F(000)                                      | 640.0                                             |
| 2 $\theta$ range for data collection        | 2.276 to 51.036°                                  |
| Index ranges                                | -10 ≤ h ≤ 10, -13 ≤ k ≤ 14, 0 ≤ l ≤ 22            |
| Reflections collected                       | 6707                                              |
| Independent reflections                     | 6707[R(int) = ?]                                  |
| Data/restraints/parameters                  | 6707/0/427                                        |
| Goodness-of-fit on F <sup>2</sup>           | 1.020                                             |
| Final R indexes [I ≥ 2σ (I)]                | R <sub>1</sub> = 0.0556, wR <sub>2</sub> = 0.1282 |
| Final R indexes [all data]                  | R <sub>1</sub> = 0.0948, wR <sub>2</sub> = 0.1415 |
| Largest diff. peak/hole / e Å <sup>-3</sup> | 0.49/-0.44                                        |

**Table S7: Crystal data and structure refinement for Compound 5**

|                                             |                                                                        |
|---------------------------------------------|------------------------------------------------------------------------|
| Identification code                         | Compound 5                                                             |
| Empirical formula                           | C <sub>17</sub> H <sub>33</sub> N <sub>2</sub> PFe                     |
| Formula weight                              | 352.27                                                                 |
| Temperature/K                               | 100.0                                                                  |
| Crystal system                              | monoclinic                                                             |
| Space group                                 | P2 <sub>1</sub> /c                                                     |
| a/Å                                         | 8.7299(4)                                                              |
| b/Å                                         | 9.9984(5)                                                              |
| c/Å                                         | 21.5918(11)                                                            |
| $\alpha$ /°                                 | 90                                                                     |
| $\beta$ /°                                  | 91.279(2)                                                              |
| $\gamma$ /°                                 | 90                                                                     |
| Volume/Å <sup>3</sup>                       | 1884.17(16)                                                            |
| Z                                           | 4                                                                      |
| $\rho_{\text{calc}}$ /g/cm <sup>3</sup>     | 1.242                                                                  |
| $\mu$ /mm <sup>-1</sup>                     | 0.882                                                                  |
| F(000)                                      | 760.0                                                                  |
| Radiation                                   | MoK $\alpha$ ( $\lambda$ = 0.71073)                                    |
| 2 $\theta$ range for data collection/°      | 3.774 to 50.978                                                        |
| Index ranges                                | -10 $\leq$ h $\leq$ 10, -12 $\leq$ k $\leq$ 12, -26 $\leq$ l $\leq$ 26 |
| Reflections collected                       | 44790                                                                  |
| Independent reflections                     | 3481 [ $R_{\text{int}}$ = 0.0488, $R_{\text{sigma}}$ = 0.0241]         |
| Data/restraints/parameters                  | 3481/0/204                                                             |
| Goodness-of-fit on F <sup>2</sup>           | 1.016                                                                  |
| Final R indexes [ $I \geq 2\sigma(I)$ ]     | $R_1$ = 0.0991, $wR_2$ = 0.3217                                        |
| Final R indexes [all data]                  | $R_1$ = 0.1017, $wR_2$ = 0.3231                                        |
| Largest diff. peak/hole / e Å <sup>-3</sup> | 1.64/-1.31                                                             |

**Computational Details:** All calculations were performed using the Gaussian09 suite of programs.<sup>6</sup> Frequency calculations on **3** were performed using the B3LYP functional.<sup>7</sup> The 6-31G basis set<sup>8</sup> modified with diffuse functions (++)<sup>9</sup> and polarization functions (d,p)<sup>10</sup> was employed for both optimization and frequency calculations. The geometry was optimized starting from the solid state structure of **3** at the same level of theory; the optimized geometry is available as a separate .xyz file.

2219 cm<sup>-1</sup>:

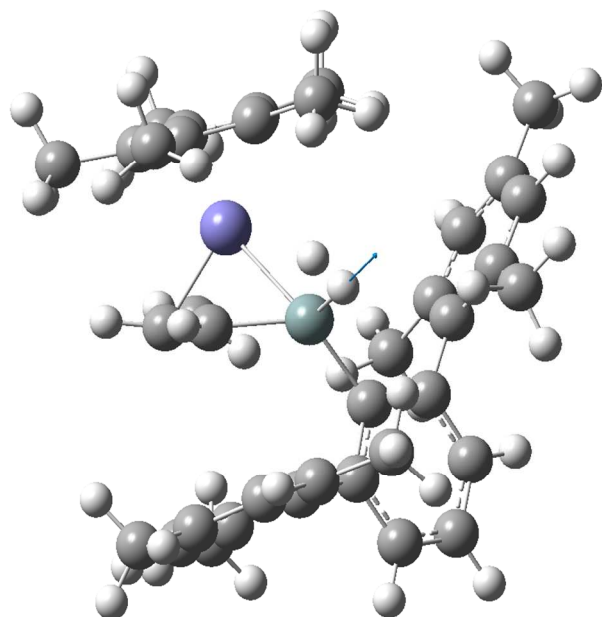

1400 cm<sup>-1</sup>:

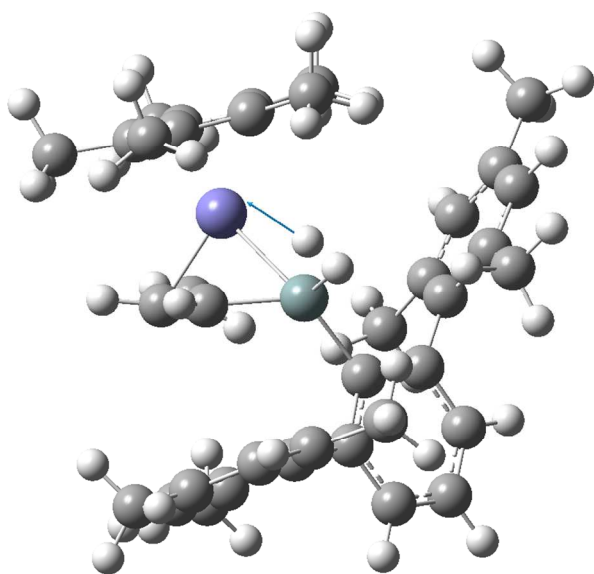

**Figure S3:** Vibrational modes of interest in **3**.

## References:

- (1) Threlkel, R. S.; Bercaw, J. E.; Seidler, P. F.; Stryker, J. M.; Bergman, R. G. *Organic Syntheses* **1987**, 65 .
- (2) Betley, T. A.; Peters, J. C. *Inorganic Chemistry* **2003**, 42, 5074-5084.
- (3) Simons, R. S.; Haubrich, S. T.; Mork, B. V.; Niemeyer, M.; Power, P. P. *Main Group Chem.* **1998**, 2, 275-283.
- (4) Tran, N. T.; Min, T.; Franz, A. K. *Chemistry: A European Journal* **2011**, 17, 98979900.
- (5) Battino, R.; Rettich, T.R.; and Tominga, T. *J. Phys. Chem. Ref. Data.* **1984**, 13, 563-600.
- (6) Gaussian 09, Revision C.01, Frisch, M. J.; Trucks, G. W.; Schlegel, H. B.; Scuseria, G. E.; Robb, M. A.; Cheeseman, J. R.; Scalmani, G.; Barone, V.; Mennucci, B.; Petersson, G. A.; Nakatsuji, H.; Caricato, M.; Li, X.; Hratchian, H. P.; Izmaylov, A. F.; Bloino, J.; Zheng, G.; Sonnenberg, J. L.; Hada, M.; Ehara, M.; Toyota, K.; Fukuda, R.; Hasegawa, J.; Ishida, M.; Nakajima, T.; Honda, Y.; Kitao, O.; Nakai, H.; Vreven, T.; Montgomery Jr., J. A.; Peralta, J. E.; Ogliaro, F.; Bearpark, M.; Heyd, J. J.; Brothers, E.; Kudin, K. N.; Staroverov, V. N.; Kobayashi, R.; Normand, J.; Raghavachari, K.; Rendell, A.; Burant, J. C.; Iyengar, S. S.; Tomasi, J.; Cossi, M.; Rega, N.; Millam, N. J.; Klene, M.; Knox, J. E.; Cross, J. B.; Bakken, V.; Adamo, C.; Jaramillo, J.; Gomperts, R.; Stratmann, R. E.; Yazyev, O.; Austin, A. J.; Cammi, R.; Pomelli, C.; Ochterski, J. W.; Martin, R. L.; Morokuma, K.; Zakrzewski, V. G.; Oth, G. A.; Salvador, P.; Dannenberg, J. J.; Dapprich, S.; Daniels, A. D.; Farkas, Ö.; Foresman, J. B.; Ortiz, J. V.; Cioslowski, J.; Fox, D. J. Gaussian, Inc., Wallingford CT, 2009.
- (7) (a) Becke, A.D. *J. Chem. Phys.* **1993**, 98,5648-5652. (b) Lee, C.; Yang, W.; Parr, R.G. *Phys. Rev. B* **1988**, 37, 785-789. (c) Vosko, S.H.; Wilk, L.; Nusair, M. *Can. J. Phys.* **1980**, 58, 1200-1211.



- (d) Stephens, P.J.; Devlin, F.J.; Chabalowski, C.F.; Frisch, M.J. *J. Phys. Chem.* **1994**, *98*, 11623-11627
- (8) (a) Rassolov, V. A.; Ratner, M. A.; Pople, J. A.; Redfern, P. C.; Curtiss, L. A. *J. Comp. Chem.*, 2001, **22**, 976-984. (b) Rassolov, V. A.; Pople, J. A.; Ratner, M. A.; Windus, T. L.; *J. Chem. Phys.*, **1998**, *109*, 1223-1229.
- (9) Clark, T.; Chandrasekhar, J.; Spitznagel, G. W.; Schleyer, P. v. R. *J. Comp. Chem.*, **1983**, *4*, 294-301.
- (10) (a) Petersson, G. A.; Bennett, A.; Tensfeldt, T. G.; Al-Laham, M. A.; Shirley, W. A.; Mantzaris, J. *J. Chem. Phys.*, **1988**, *89*, 2193-2218. (b) Petersson, G. A.; Al-Laham, M. A. *J. Chem. Phys.*, 1991, **94**, 6081-6090.
